# Supplementary material
Source: PubMed Central journal article supplement (PMC3149307)

## Supplemental Table 1. Oligonucleotides

| Name   | Sequence                                                                                                          |
|--------|-------------------------------------------------------------------------------------------------------------------|
| oJB500 | 5'-GGATTTTTCTGTGGATGCTTTTTCTTTTTAATTAATAAATTTAGTCGTTTATTA<br>ACTATTGCTTTAAGTTTTTTTTCAACAAGCGGATCCCCGGGTTAATTAA-3' |
| oJB501 | 5'-CACGTTGACAACGCTAAAATCCAACCATGAAAAATTCAGCTATTAACAA<br>GTCCAAGAAGAAAGTAAAACATACGATGACGAATTCGAGCTCGTTTAAAC-3'     |
| oJB502 | 5'-CGGTCTCAACTTACCAAAGCAACACACGGTTAGAAAGACTTATAACTTGC<br>TTTTACTATATACAAAATTCATAATTACGGATCCCCGGGTTAATTAA-3'       |
| oJB503 | 5'-TTAACTCAAAAATCAGAAAGGTGGATAAATTTTTTGAACAATCACAATCGA<br>TTGATCACTCATTAGAGAATTGAAACTTGAATTCGAGCTCGTTTAAAC-3'     |
| oJB504 | 5'-AATTTCTAAATAGGAAAGTATTGAGAAATAACTGTGTTAATAATCTAGAAG<br>AGATCCTTGAATAATTTGTGCTACAACGCGGATCCCCGGGTTAATTAA-3'     |
| oJB505 | 5'-AAAAACAAAAACTATTACATGTTTGAGGGGTATATGTGTGCCATAAAAAA<br>CAAGATATTTGACTTGCACATACCAAAGGAATTCGAGCTCGTTTAAAC-3'      |
| oJB506 | 5'-GATTTGACAACTGCACGGTACAGTAAGTTTTGTTGTATGCAGAGGAAAG<br>AAAGAGATTTTAACTGGAAAAGTGTATAGACGGATCCCCGGGTTAATTAA-3'     |
| oJB507 | 5'-TAACAGTAAAAGATGAAATAAACGGAGGTTCAAATGAGAAAAAGAAAAA<br>GGGTGTTCAAATCATCAAATATTTAGCAGAATTCGAGCTCGTTTAAAC-3'       |

## Supplemental Table 2. *S. pombe* strains

| Name    | Genotype                                                                 | Source                |
|---------|--------------------------------------------------------------------------|-----------------------|
| KGY425  | <i>h- his3-D1 leu1-32 ura4-D18 ade6-m210</i>                             | Burke and Gould, 1994 |
| JBY389  | <i>h- his3-D1 leu1-32 ura4-D18 ade6-m210 hmg1-T1028A</i>                 | Burg et al., 2008     |
| PEY523  | <i>h- his3-D1 leu1-32 ura4-D18 ade6-m210 Δins1::kan<sup>R</sup></i>      | Hughes et al., 2005   |
| LJY1525 | <i>h- leu1-32 ura4-D18 ade6-m210 Δsty1::ura4<sup>+</sup></i>             | Bimbó et al., 2005    |
| LJY1625 | <i>h- leu1-32 ura4-D18 ade6-m210 Δssp2::ura4<sup>+</sup></i>             | Bimbó et al., 2005    |
| PEY849  | <i>h+ Δamk2::kan<sup>R</sup> leu1-32 ura4-D18 ade6-m210 or ade6-m216</i> | Bioneer Corporation   |
| JBY608  | <i>h- leu1-32 ura4-D18 his3-D1 ade6-m210 Δppa1::kan<sup>R</sup></i>      | This study            |
| JBY611  | <i>h- leu1-32 ura4-D18 his3-D1 ade6-m210 Δppa2::kan<sup>R</sup></i>      | This study            |
| JBY613  | <i>h- leu1-32 ura4-D18 his3-D1 ade6-m210 Δsds23::kan<sup>R</sup></i>     | This study            |
| JBY639  | <i>h- leu1-32 ura4-D18 his3-D1 ade6-m210 Δppe1::nat<sup>R</sup></i>      | This study            |

## SUPPLEMENTAL FIGURE LEGENDS

Fig. S1. Sty1 is not required for low-glucose Hmg1 phosphorylation. Wild-type and *sty1* $\Delta$  cells growing exponentially in YES medium were collected by centrifugation, resuspended in YES medium or glucose-free medium, and harvested after 30 min. Hmg1 immunoprecipitates were blotted using anti-Hmg1 IgG or Hmg1 phosphospecific antibodies.

Fig. S2. Ppa1 and Ppa2 are not required for low-glucose Hmg1 phosphorylation. Wild-type, *ppa1* $\Delta$  and *ppa2* $\Delta$  cells growing exponentially in YES medium were harvested by centrifugation and then switched to glucose-free medium for 30 min. Cells were treated with glucose (30 g/L) for 5 min as indicated. Hmg1 immunoprecipitates were prepared and blotted using anti-Hmg1 IgG or Hmg1 phosphospecific antibodies.

# Figure S1

IP: anti-Hmg1

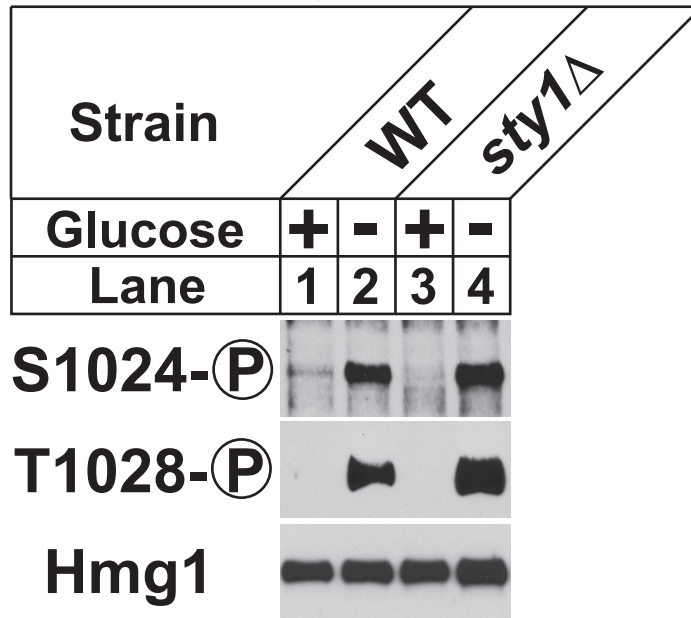

# Figure S2

IP: anti-Hmg1

| Strain  | WT |   | <i>ppa1</i> Δ |   | <i>ppa2</i> Δ |   |
|---------|----|---|---------------|---|---------------|---|
| Glucose | -  | + | -             | + | -             | + |
| Lane    | 1  | 2 | 3             | 4 | 5             | 6 |

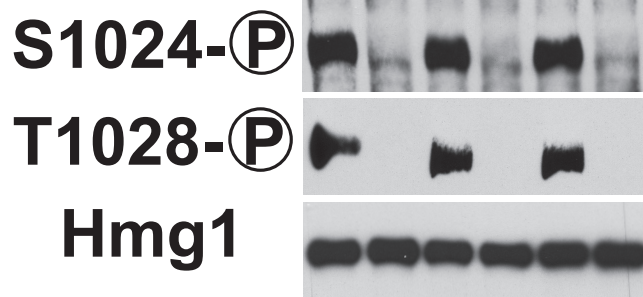

Supplement: supp_M111.233452_jbc.M111.233452-1.pdf [file supp_M111.233452_jbc.M111.233452-1.pdf]
